# Supplementary material for: Genetic heterogeneity of motor neuropathies
Source: PubMed Central journal article supplement (PMC5373778; doi:10.1212/wnl.0000000000003772), 2017-03-28
Supplement: supp_WNL.0000000000003772_e-tables.pdf [file supp_WNL.0000000000003772_e-tables.pdf]

**Suppl. Table e-1.** Summary of the clinical presentation of the patients in the dHMN group A) Confirmed causative mutations

| Family / Patient / Age/ Sex | Gene  | Nucleotide / Amino acid change | Phenotype            | Inherit             | Age onset | Lower limb                 |                            |                      |         | Upper limb |         |          |         | Deformity / Contracture                      | Walking / Orthotics    | Additional features                   |
|-----------------------------|-------|--------------------------------|----------------------|---------------------|-----------|----------------------------|----------------------------|----------------------|---------|------------|---------|----------|---------|----------------------------------------------|------------------------|---------------------------------------|
|                             |       |                                |                      |                     |           | Weakness                   | Wasting                    | Reflexes ankle /knee | Sensory | Weakness   | Wasting | Reflexes | Sensory |                                              |                        |                                       |
| F1 / P1<br>26y / f          | HSPB8 | c.421A>G<br>p.(Lys141Glu)      | dHMN-II              | AD                  | 10y       | d ++                       | d +                        | a / ↑                | pain    | d +        | -       | N        | -       | pes cavus                                    | HW /<br>AFO            | -                                     |
| F2 / P2<br>36y / m          | GARS  | c.647A>G<br>p.(His216Arg)      | dHMN-V<br>upper limb | AD                  | 14y       | d +                        | d +                        | ↓/n                  | +       | d +++      | d+++    | A        | +       | split hand<br>pes cavus                      | -                      | swollen tongue                        |
| F2 / P3<br>66y / f          | GARS  | c.647A>G<br>p.(His216Arg)      | dHMN-V<br>upper limb | AD                  | 12y       | d +                        | d +                        | ↓/↓                  | +       | d +++      | d +++   | A        | +       | split hand                                   | -                      | swollen tongue<br>immune arthritis    |
| F3 / P4<br>51y / f          | GARS  | c.1528A>C<br>p.(Lys510Gln)     | dHMN-V<br>lower limb | AD                  | 5y        | d ++                       | d ++                       | a / ↑                | pain    | d ++       | d ++    | ↑        | pain    | pes cavus /<br>tight Achilles                | tiptoeing,<br>HW       | hearing deficit                       |
| F3 / P5<br>9y / f           | GARS  | c.1528A>C<br>p.(Lys510Gln)     | dHMN-V<br>lower limb | AD                  | 5y        | d +                        | d +                        | ↓/ ↑                 | -       | -          | -       | N        | -       | tight Achilles                               | tiptoeing,<br>falls    | -                                     |
| F3 / P6<br>28y / f          | GARS  | c.1528A>C<br>p.(Lys510Gln)     | dHMN-V<br>lower limb | AD                  | 6y        | d ++                       | d ++                       | a / n                | +       | d +        | d +     | N        | +       | pes cavus /<br>tight Achilles                | tiptoeing,<br>HW       | -                                     |
| F4/ P7<br>46y / f           | SYT2  | c.923C>T<br>p.(Pro308Leu)      | SMA-LED              | AD                  | birth     | R d +++<br>p ++<br>L d +++ | R d +++<br>p ++<br>L d +++ | a / a                | +       | d +        | -       | A        | +       | pes cavus<br>splayed toes /<br>hip dysplasia | HW,TW /<br>knee splint | -                                     |
| F4/ P8<br>29y / f           | SYT2  | c.923C>T<br>p.(Pro308Leu)      | SMA-LED              | AD                  | birth     | d +++                      | d +++                      | a / a                | +       | d +        | -       | A        | +       | pes cavus<br>hammer toes /<br>hip dysplasia  | waddling /<br>AFO      | -                                     |
| F4/ P9<br>8y / m            | SYT2  | c.923C>T<br>p.(Pro308Leu)      | SMA-LED              | AD                  | birth     | -                          | -                          | a / a                | +       | -          | -       | A        | -       | pes planus                                   | HW /<br>insoles        | motor delay,<br>ADHD                  |
| F4/ P10<br>17y / m          | SYT2  | c.923C>T<br>p.(Pro308Leu)      | SMA-LED              | AD                  | birth     | -                          | -                          | a / a                | -       | -          | -       | A        | -       | pes cavus<br>hammer toes                     | -                      | -                                     |
| F4/ P11<br>43y / m          | SYT2  | c.923C>T<br>p.(Pro308Leu)      | SMA-LED              | AD                  | birth     | d +++                      | d +++                      | a / a                | -       | -          | -       | A        | -       | hammer toes                                  | HW, TW                 | reflex<br>facilitation<br>on exercise |
| F4/ P12<br>14y / f          | SYT2  | c.923C>T<br>p.(Pro308Leu)      | SMA-LED              | AD                  | birth     | R d ++<br>L d +            | -                          | a / a                | -       | -          | -       | A        | -       | pes cavus<br>splayed toes /<br>hip dysplasia | HW                     | -                                     |
| F5/ P13<br>19y / m          | BICD2 | c.320C>T<br>p.(Ser107Leu)      | SMA-LED              | isolated<br>de novo | birth     | d +++                      | d ++                       | a / ↓                | -       | -          | d +     | ↓        | -       | club feet<br>scapular<br>winging             | steppage               | motor delay                           |
| F6/ P14<br>42y / f          | BICD2 | c.320C>T<br>p.(Ser107Leu)      | SMA-LED              | AD                  | birth     | d +<br>p +                 | d ++                       | ↑/ ↑                 | -       | -          | -       | N        | -       | crowded toes<br>scapular<br>winging          | difficulties           | motor delay                           |
| F6/ P15<br>7y / f           | BICD2 | c.320C>T<br>p.(Ser107Leu)      | SMA-LED              | AD                  | birth     | d +<br>p +                 | d ++                       | ↑/ ↑                 | -       | -          | -       | ↑        | -       | pes<br>equinovarus,<br>scapular<br>winging   | difficulties           | motor delay                           |

**Abbreviations:** F, family; P, patient; y, year; m, male; f, female; †, deceased; AD, autosomal dominant; AR, autosomal recessive; d, distal; p, proximal; R, right; L, left; +, mild; ++, moderate; +++, severe; a, absent; n, normal; ↑, increased; ↓, decreased; -, none; HW, impaired heel walking; TW, impaired toe walking; AFO, ankle foot orthosis; SGA, small for gestational age, SMA-LED, spinal muscular atrophy with lower extremity dominance

**Suppl. Table e-1.** Summary of the clinical presentation of the patients in the dHMN group A) Confirmed causative mutations

| Family / Patient / Age/ Sex | Gene    | Nucleotide / Amino acid change          | Phenotype          | Inherit             | Age onset | Lower limb       |               |                      |         | Upper limb      |         |          |         | Deformity / Contracture                               | Walking / Orthotics                    | Additional features                        |
|-----------------------------|---------|-----------------------------------------|--------------------|---------------------|-----------|------------------|---------------|----------------------|---------|-----------------|---------|----------|---------|-------------------------------------------------------|----------------------------------------|--------------------------------------------|
|                             |         |                                         |                    |                     |           | Weakness         | Wasting       | Reflexes ankle /knee | Sensory | Weakness        | Wasting | Reflexes | Sensory |                                                       |                                        |                                            |
| F6 / P16<br>6y / m          | BICD2   | c.320C>T<br>p.(Ser107Leu)               | SMA-LED            | AD                  | birth     | d +<br>p +       | d ++          | ↑/ ↑                 | -       | -               | -       | ↑        | -       | scapular winging                                      | difficulties                           | motor delay                                |
| F6 / P17<br>6y / m          | BICD2   | c.320C>T<br>p.(Ser107Leu)               | SMA-LED            | AD                  | birth     | d +<br>p +       | d ++          | ↑/ ↑                 | -       | -               | -       | ↑        | -       | scapular winging                                      | difficulties                           | motor delay                                |
| F7 / P18<br>28y / m         | DYNC1H1 | c.1834G>A<br>p.(Val612Met)              | SMA-LED            | AD                  | 6y        | d +++            | d +++         | a / ↓                | -       | -               | -       | n        | -       | pes cavus,<br>crawled toes                            | HW,TW /<br>splints                     | pyramidal<br>signs                         |
| F8 / P19<br>3y+ / m         | IGHMBP2 | c.292_303<br>delinsATGCT<br>p.(Gly98fs) | SMARD1             | AR                  | birth     | d +++<br>p ++    | d ++          | a / a                | -       | d +++<br>p ++   | d ++    | a        | -       | pes cavus /<br>flexed fingers<br>tight Achilles       | not<br>developed                       | preterm,<br>SGA,<br>respiratory<br>failure |
| F8 / P20<br>6mo+ / m        | IGHMBP2 | c.292_303<br>delinsATGCT<br>p.(Gly98fs) | SMARD1             | AR                  | birth     | d +++            | d +           | a / a                | -       | d +++           | d +     | a        | -       | pes cavus                                             | not<br>developed                       | preterm,<br>SGA,<br>respiratory<br>failure |
| F9 / P21<br>21y / m         | IGHMBP2 | c.1813C>T<br>p.(Arg605*)                | dHMN               | AR                  | 7y        | d +++<br>p +++   | d +++<br>p ++ | a / ↓                | -       | d ++            | d +     | n        | -       | pes cavus                                             | ambulant<br>with crutch,<br>wheelchair | -                                          |
| F9 / P22<br>19y / f         | IGHMBP2 | c.1813C>T<br>p.(Arg605*)                | dHMN               | AR                  | 10y       | d ++             | d ++          | a / a                | -       | d +             | d +     | a        | -       | pes cavus                                             | HW,TW /<br>AFO                         | -                                          |
| F10 / P23<br>9y / m         | TRPV4   | c.805C>T<br>p.(Arg269Cys)               | congenital<br>dHMN | de novo             | birth     | d +++<br>p ++    | d ++          | a / a                | -       | -               | -       | ↓        | -       | pes cavus,<br>scapular<br>winging /<br>tight Achilles | HW,TW /<br>splints,<br>wheelchair      | intermittent<br>horse voice                |
| F11 / P24<br>49y / f        | TRPV4   | c.184G>A<br>p.(Asp62Asn)                | congenital<br>dHMN | AD                  | 41y       | d +++            | d ++          | a / a                | -       | -               | -       | n        | -       | pes cavus,<br>crawled toes                            | HW,TW /<br>splints,<br>crutches        | livid skin                                 |
| F11 / P25<br>43y / m        | TRPV4   | c.184G>A<br>p.(Asp62Asn)                | congenital<br>dHMN | AD                  | birth     | -                | -             | n                    | -       | -               | -       | n        | -       | talipes                                               | -                                      | -                                          |
| F12 / P26<br>16y / m        | MFN2    | c.1126 A>G<br>p.(Met376Val)             | dHMN               | isolated<br>de novo | 14y       | d +++            | d ++          | ↑/↑                  | pain    | -               | -       | ↑        | -       | pes cavus,<br>hammer toes /<br>tight Achilles         | HW<br>tiptoeing                        | -                                          |
| F13 / P27<br>70y / m        | MFN2    | c.2119C>T<br>p.(Arg707Trp)              | dHMN               | isolated<br>de novo | 55y       | R d +++<br>p +++ | d ++          | a / a                | -       | R d ++<br>p +++ | R d +   | a        | -       | -                                                     | non-<br>ambulant /<br>wheelchair       | Alzheimer<br>disease                       |

**Abbreviations:** F, family; P, patient; y, year; m, male; f, female; AR, autosomal recessive; AD, autosomal dominant; d, distal; p, proximal; R, right; +, mild; ++, moderate; +++, severe; a, absent; ↑ increased; ↓, decreased; n, normal; -, none; HW, impaired heel walking; TW, impaired toe walking, SMA-LED, spinal muscular atrophy with lower extremity dominance; SMARD1, spinal muscular atrophy with respiratory distress

**Suppl. Table e-1.** Summary of the clinical presentation of the patients in the dHMN group **B**) Possibly causative mutations

| Family / Patient / Age/ Sex | Gene     | Nucleotide / Amino acid change | Phenotype | Inherit  | Age onset | Lower limb   |         |                      |         | Upper limb |         |          |         | Deformity / Contracture                        | Walking / Orthotics | Additional features                     |
|-----------------------------|----------|--------------------------------|-----------|----------|-----------|--------------|---------|----------------------|---------|------------|---------|----------|---------|------------------------------------------------|---------------------|-----------------------------------------|
|                             |          |                                |           |          |           | Weakness     | Wasting | Reflexes ankle /knee | Sensory | Weakness   | Wasting | Reflexes | Sensory |                                                |                     |                                         |
| F14 / P28<br>32y / f        | IGHMBP2  | c.2752 C>T<br>p.(Arg918Cys)    | dHMN      | AR       | 6y        | d ++         | d ++    | a / a                | +       | d ++       | d ++    | n        | -       | hammer toes                                    | HW,TW / splints     | -                                       |
| F14 / P29<br>13y / m        | IGHMBP2  | c.2752 C>T<br>p.(Arg918Cys)    | dHMN      | AR       | 4y        | d ++         | d ++    | a / a                | -       | -          | -       | n        | -       | pes cavus                                      | HW,TW / splints     | -                                       |
| F14 / P30<br>30y / m        | IGHMBP2  | c.2752 C>T<br>p.(Arg918Cys)    | dHMN      | AR       | 10y       | d ++         | d ++    | a / a                | -       | -          | -       | n        | -       | pes cavus                                      | HW,TW / splints     | -                                       |
| F14 / P31<br>48y / m        | IGHMBP2  | c.2752 C>T<br>p.(Arg918Cys)    | dHMN      | AR       | 7y        | d +++        | d +++   | a / a                | +++     | d ++       | d +     | n        | -       | pes cavus                                      | HW,TW / splints     | -                                       |
| F15 / P32<br>3,5y / m       | IGHMBP2  | c.767C>G<br>p.(Ala256Gly)      | dHMN      | isolated | birth     | d +++        | d ++    | a / ↓                | -       | -          | -       | ↓        | -       | pes cavus<br>scapular<br>winging               | falls               | motor delay                             |
| F16 / P33<br>72y / f        | DHTKD1   | c.628G>T<br>p.(Ala210Ser)      | dHMN      | AD       | 10y       | d ++         | d +++   | a / a                | -       | d ++       | d ++    | a        | -       | pes cavus,<br>clawed toes                      | HW                  | 'crane leg'<br>ulnar split hand         |
| F16 / P34<br>48y / m        | DHTKD1   | c.628G>T<br>p.(Ala210Ser)      | dHMN      | AD       | 39y       | d ++<br>p ++ | d +++   | a / a                | +       | d ++       | d ++    | a        | +       | pes cavus<br>clawed toes                       | HW, TW /<br>insoles | 'crane leg'<br>ulnar split hand         |
| F16 / P35<br>45y / m        | DHTKD1   | c.628G>T<br>p.(Ala210Ser)      | dHMN      | AD       | 21y       | d ++         | d +++   | a / a                | -       | d +        | d ++    | a        | -       | pes cavus<br>clawed toes                       | HW                  | 'crane leg'<br>ulnar split hand         |
| F17 / P36<br>33y / f        | ARHGEF10 | c.1949G>A<br>p.(Cys650Tyr)     | dHMN      | isolated | birth     | d ++         | d +     | a / a                | -       | d ++       | d +     | a        | -       | arthrogryposis<br>talipes /<br>hip dyslocation | HW,TW               | keratosis<br>swallowing<br>difficulties |

**Abbreviations:** F, family; P, patient; y, year; m, male; f, female; AD, autosomal dominant; AR, autosomal recessive; R, right; L, left; d, distal ; p, proximal; +, mild; ++, moderate; +++, severe; a, absent; n, normal; ↑, increased; ↓, decreased; -, none; HW, impaired heel walking; TW, impaired toe walking; AFO, ankle foot orthosis; ADHD, attention deficit hyperactivity disorder; SMA-LED, spinal muscular atrophy with lower extremity dominance

**Suppl. Table e-2.** Summary of the clinical presentation of the patients and confirmed mutations in the motor CMT2 group

| Family / Patient / Age/ Sex | Gene  | Nucleotide / Amino acid change | Inherit | Age onset | Lower limb |         |                      |         | Upper limb |         |          |         | Deformity / Contracture                     | Walking/ Orthotics                 | Additional features                               |
|-----------------------------|-------|--------------------------------|---------|-----------|------------|---------|----------------------|---------|------------|---------|----------|---------|---------------------------------------------|------------------------------------|---------------------------------------------------|
|                             |       |                                |         |           | Weakness   | Wasting | Reflexes ankle /knee | Sensory | Weakness   | Wasting | Reflexes | Sensory |                                             |                                    |                                                   |
| F18 / P37<br>56y / m        | AARS  | c.986G>A,<br>p.(Arg329His)     | AD      | 50y       | d +++      | d ++    | a / a                | +       | -          | -       | n        | -       | pes cavus /<br>tight Achilles               | HW,TW /<br>AFO                     | Dupuytren's<br>contracture                        |
| F18 / P38<br>32y / m        | AARS  | c.986G>A,<br>p.(Arg329His)     | AD      | 28y       | d ++       | d ++    | a / a                | ++      | d ++       | d ++    | a        | ++      | pes cavus                                   | HW,TW /<br>AFO                     | JRA , bilateral hip<br>replacement                |
| F19 / P39<br>77y †/ m       | AARS  | c.986G>A,<br>p.(Arg329His)     | AD      | 60y       | d +++      | d +++   | a / a                | ++      | d ++       | d ++    | a        | ++      | pes cavus<br>toe drop                       | HW, TW /<br>AFO<br>crutches        | -                                                 |
| F19 / P40<br>50y / m        | AARS  | c.986G>A,<br>p.(Arg329His)     | AD      | 30y       | d ++       | d ++    | a / a                | ++      | d ++       | d ++    | a        | ++      | pes cavus<br>split hand                     | stepping /<br>stick<br>hand splint | TIA                                               |
| F20 / P41<br>20y / m        | AARS  | c.986G>A,<br>p.(Arg329His)     | AD      | 12y       | d +++      | d ++    | a / a                | +       | -          | -       | n        | -       | pes cavo-<br>equinus /<br>tight Achilles    | stepping /<br>insoles              | -                                                 |
| F21 / P42<br>54y / f        | AARS  | c.986G>A,<br>p.(Arg329His)     | AD      | 20y       | d +++      | d +++   | a / a                | ++      | d ++       | d +     | ↓        | -       | pes cavus                                   | HW,TW<br>stepping /<br>AFO         | hearing deficit                                   |
| F22 / P43<br>59y / m        | DNM2  | c.1739T>C<br>p.(Met580Thr)     | AD      | 5y        | d +++      | d +++   | a / a                | +       | d +++      | d +++   | a        | +       | clawed toes<br>curled fingers<br>split hand | HW,TW /<br>AFO                     | hearing deficit<br>respiratory muscle<br>weakness |
| F22 / P44<br>36y / f        | DNM2  | c.1739T>C<br>p.(Met580Thr)     | AD      | 11y       | d +++      | d +++   | a / a                | +       | d +++      | d +++   | a        | +       | clawed toes<br>curled fingers               | HW,TW /<br>AFO                     | -                                                 |
| F22 / P45<br>30y / f        | DNM2  | c.1739T>C<br>p.(Met580Thr)     | AD      | 13y       | d ++       | d ++    | a / a                | +       | d ++       | d ++    | a        | +       | clawed toes                                 | HW, TW /<br>AFO                    | -                                                 |
| F23 / P46<br>35y / f        | MFN2  | c.1403G>A,<br>p.(Arg468His)    | AD      | 20y       | d+         | d+      | a/a                  | +       | d+++       | d+++    | a        | +       | clawed<br>fingers                           | hand splint                        | -                                                 |
| F24 / P47<br>59 / m         | MORC2 | c.C754T,<br>p.(Arg252Trp)      | AD      | 13y       | d+++       | d+++    | a/a                  | +++     | d+++       | d+++    | a        | ++      | pes cavus<br>arthrodesis                    | non-<br>ambulant                   | mild deafness                                     |
| F24 / P48<br>59 / m         | MORC2 | c.C754T,<br>p.(Arg252Trp)      | AD      | 10y       | d+++       | d+++    | a/a                  | +++     | d+++       | d+++    | a        | ++      | pes cavus<br>arthrodesis                    | non-<br>ambulant                   | mild deafness                                     |

**Abbreviations:** F, family; P, patient; y, year; m, male; f, female; AD, autosomal dominant; d, distal ; +, mild; ++, moderate; +++, severe; a, absent; n, normal; ↓, decreased; -, none; HW, impaired heel walking; TW, impaired toe walking; AFO, ankle foot orthosis; JRA, juvenile rheumatoid arthritis; TIA, transient ischaemic attack



|                      |                    |                                                          |          |     |         |        |       |    |                            |                            |   |    |                          |                                  |                                                                                                   |
|----------------------|--------------------|----------------------------------------------------------|----------|-----|---------|--------|-------|----|----------------------------|----------------------------|---|----|--------------------------|----------------------------------|---------------------------------------------------------------------------------------------------|
| F31 / P55<br>25y / m | FIG4               | c.2386C>T<br>p.(Gln796*)                                 | AD       | 17y | d ++    | d +++  | a / ↑ | ++ | -                          | -                          | ↑ | ++ | pes cavus<br>clawed toes | HW, TW                           | optic atrophy<br>pyramidal signs                                                                  |
| F32 / P56<br>24y / m | SLC52A3<br>SLC52A2 | c.1371C>G,<br>p.(Phe457Leu)<br>c.819C>T<br>p.(Met273Ile) | AR       | 19y | d ++    | d ++   | a / a | +  | d +++<br>p +++             | d +++<br>p +               | a | +  | curled<br>fingers        | ataxic<br>HW, TW /<br>wheelchair | ophthalmoplegia<br>sensorineural<br>hearing loss<br>bulbar palsy<br>ataxia<br>respiratory failure |
| F33 / P57<br>19y / m | TBX5               | c.331G>T,<br>p.(Asp111Tyr)                               | AD       | 2y  | d ++    | d ++   | ↑ / ↑ | +  | d ++                       | d +                        | ↑ | +  | pes cavus<br>clawed toes | clumsy                           | shoulder deformity<br>thoracic kyphosis<br>scapular winging                                       |
| F34 / P58<br>16y / m | STAT5B             | c.944A>C,<br>p.(Glu315Ala)                               | AR       | 10y | d ++    | d ++   | ↓ / ↓ | -  | -                          | -                          | ↓ | -  | -                        | HW, TW                           | postnatal growth<br>retardation<br>face dysmorphia<br>ptosis<br>facial weakness                   |
| F34 / P59<br>17y / f | STAT5B             | c.944A>C,<br>p.(Glu315Ala)                               | AR       | 10y | d ++    | d +    | ↓ / ↓ | -  | -                          | -                          | ↓ | -  | -                        | HW, TW                           | postnatal growth<br>retardation<br>face dysmorphia<br>ptosis<br>facial weakness                   |
| F35 / P60<br>29y / m | PTEN               | c.269T>C<br>p.(Phe90Ser)                                 | isolated | 3y  | R d +++ | R d ++ | ↑ / ↑ | -  | L d +++<br>p +++<br>R d ++ | L d +++<br>p +++<br>R p ++ | a | -  | pes cavus<br>clawed toes | falls,<br>HW,TW                  | cranial nerve III,<br>IV., VII., X.,XII.<br>macrocephaly<br>development delay                     |

**Abbreviations:** F, family; P, patient; y, year; m, male; f, female; AD, autosomal dominant; AR, autosomal recessive; X, X-linked; R, right; L, left; d, distal ; p, proximal; +, mild; ++, moderate; +++, severe; a, absent; ↑, increased; ↓, decreased; -, none; HW, impaired heel walking; TW, impaired toe walking; AFO, ankle foot orthosis

**Suppl. Table e-4.** Coverage of rare genetic variants from WES

| Sample ID(s)     | Average Read Depth(s) | Gene Name | Ensembl Gene ID | Ensembl Transcript ID | Exon | chromosome | genomic (hg19)               | cDNA           | protein  | Genotype     |
|------------------|-----------------------|-----------|-----------------|-----------------------|------|------------|------------------------------|----------------|----------|--------------|
| F2/P2            | 51.2                  | GARS      | ENSG00000106105 | ENST00000389266       | 5    | 7          | g.30642727A>G                | c.A647G        | p.H216R  | Heterozygous |
| F3/P4-5          | 55.4, 57.5            | GARS      | ENSG00000106105 | ENST00000389266       | 12   | 7          | g.30661993A>C                | c.A1528C       | p.K510Q  | Heterozygous |
| F4/P8-P9         | 77.1, 75.9            | SYT2      | ENSG00000143858 | ENST00000367268       | 8    | 1          | g.202568476G>A               | c.C923T        | p.P308L  | Heterozygous |
| F5/P13,F6/P14-15 | 76.9, 70.5, 68.2      | BICD2     | ENSG00000185963 | ENST00000375512       | 2    | 9          | g.95491439G>A                | c.C320T        | p.S107L  | Heterozygous |
| F9/P21-22        | 78.6, 72.8            | IGHMBP2   | ENSG00000132740 | ENST00000255078       | 13   | 11         | g.68703761C>T                | c.C1813T       | p.R605X  | Heterozygous |
| F10/P23          | 73.3                  | TRPV4     | ENSG00000111199 | ENST00000538125       | 5    | 12         | g.110238471G>A               | c.C805T        | p.R269C  | Heterozygous |
| F11/P24-25       | 43.4                  | TRPV4     | ENSG00000111199 | ENST00000538125       | 2    | 12         | g.110252418C>T               | c.G184A        | p.D62N   | Heterozygous |
| F16/P34-35-36    | 80.9, 82.0, 48.1      | DHTKD1    | ENSG00000181192 | ENST00000263035       | 4    | 10         | g.12129639G>T                | c.G628T        | p.A210S  | Heterozygous |
| F24/ P47         | 85.1                  | MORC2     | ENSG00000133422 | ENST00000215862       | 10   | 22         | g.31337490G>A                | c.C568T        | p.R190W  | Heterozygous |
| F26/P50          | 114.8                 | C12orf65  | ENSG00000130921 | ENST00000546132       | 3    | 12         | g.123738316_123738317insATCC | c.95_96insATCC | p.L32fs  | Homozygous   |
| F27/P51          | 63.5                  | FUS       | ENSG00000089280 | ENST00000568685       | 14   | 16         | g.31202419A>G                | c.A1532G       | p.K511R  | Heterozygous |
| F28/P52          | 74.7                  | DCTN1     | ENSG00000204843 | ENST00000361874       | 32   | 2          | g.74588640G>A                | c.C3823T       | p.R1275C | Heterozygous |
| F29/P53          | 72.1                  | ATP7A     | ENSG00000165240 | ENST00000341514       | 10   | X          | g.77268482A>G                | c.A2279G       | p.Y760C  | Homozygous   |
| F30/P54          | 75.1                  | SACS      | ENSG00000151835 | ENST00000382298       | 10   | 13         | g.23911234G>T                | c.C6781A       | p.L2261I | Heterozygous |
| F30/P54          | 75.1                  | SACS      | ENSG00000151835 | ENST00000382298       | 8    | 13         | g.23929171G>C                | c.C1580G       | p.S527X  | Heterozygous |
| F31/P55          | 55.0                  | FIG4      | ENSG00000112367 | ENST00000230124       | 21   | 6          | g.110113794C>T               | c.C2386T       | p.Q796X  | Heterozygous |
| F32/P56          | 51.8                  | SLC52A3   | ENSG00000101276 | ENST00000217254       | 5    | 20         | g.741709G>C                  | c.C1371G       | p.F457L  | Heterozygous |
| F33/P57          | 46.2                  | TBX5      | ENSG00000089225 | ENST00000405440       | 4    | 12         | g.114837349C>A               | c.G331T        | p.D111Y  | Heterozygous |
| F34/P58-59       | 70.3, 84.0            | STAT5B    | ENSG00000173757 | ENST00000293328       | 8    | 17         | g.40370786T>G                | c.A944C        | p.E315A  | Homozygous   |
| F35/P60          | 67.1                  | PTEN      | ENSG00000171862 | ENST00000371953       | 5    | 10         | g.89692785T>C                | c.T269C        | p.F90S   | Heterozygous |

**Suppl. Table e-5.** Population frequencies of rare genetic variants from WES

| SAMPLE INFO      | DETAILS OF VARIATION |          | POPULATION ALLELE FREQUENCIES / IDS |           |         |         |               |
|------------------|----------------------|----------|-------------------------------------|-----------|---------|---------|---------------|
|                  |                      |          | Sample ID(s)                        | Gene Name | protein | ExAC    | NHLBI_ESP6500 |
| F2/P2            | GARS                 | p.H216R  | 8.28E-06                            | .         | .       | 0.00178 | .             |
| F3/P4-5          | GARS                 | p.K510Q  | .                                   | .         | .       | 0.00356 | .             |
| F4/P8-P9         | SYT2                 | p.P308L  | .                                   | .         | .       | 0.00356 | .             |
| F5/P13,F6/P14-15 | BICD2                | p.S107L  | .                                   | .         | .       | 0.00534 | rs398123028   |
| F9/P21-22        | IGHMBP2              | p.R605X  | .                                   | .         | .       | 0.00356 | .             |
| F10/P23          | TRPV4                | p.R269C  | .                                   | .         | .       | 0.00178 | rs267607146   |
| F11/P24-25       | TRPV4                | p.D62N   | 8.44E-06                            | .         | .       | 0.00178 | .             |
| F16/P34-35-36    | DHTKD1               | p.A210S  | 0.0029                              | 0.0028    | .       | 0.00890 | rs146741810   |
| F24/ P47         | MORC2                | p.R190W  | .                                   | .         | .       | 0.00178 | .             |
| F26/P50          | C12orf65             | p.L32fs  | 4.13E-05                            | .         | .       | 0.01068 | rs765675424   |
| F27/P51          | FUS                  | p.K511R  | .                                   | .         | .       | 0.00178 | .             |
| F28/P52          | DCTN1                | p.R1275C | 8.29E-06                            | .         | .       | 0.00178 | .             |
| F29/P53          | ATP7A                | p.Y760C  | 4.56E-05                            | .         | .       | 0.00356 | .             |
| F30/P54          | SACS                 | p.L2261I | 0.0048                              | 0.0037    | .       | 0.00356 | rs146722795   |
| F30/P54          | SACS                 | p.S527X  | .                                   | .         | .       | 0.00178 | .             |
| F31/P55          | FIG4                 | p.Q796X  | .                                   | .         | .       | 0.00178 | .             |
| F32/P56          | SLC52A3              | p.F457L  | 0.0005                              | 0.0005    | .       | 0.00178 | rs145431028   |
| F33/P57          | TBX5                 | p.D111Y  | 0.0034                              | 0.0034    | .       | 0.00534 | rs77357563    |
| F34/P58-59       | STAT5B               | p.E315A  | 0.0027                              | .         | .       | 0.00712 | rs572536541   |
| F35/P60          | PTEN                 | p.F90S   | .                                   | .         | .       | 0.00178 | .             |



**Suppl. Table e-6.** Functional prediction of rare genetic variants from WES

| SAMPLE INFO      |           | DETAILS OF VARIATION |      |           | FUNCTIONAL PREDICTIONS / SCORES |                |                  |        |             |              |                        |
|------------------|-----------|----------------------|------|-----------|---------------------------------|----------------|------------------|--------|-------------|--------------|------------------------|
| Sample ID(s)     | Gene Name | protein              | SIFT | Polyphen2 | LRT                             | MutationTaster | MutationAssessor | FATHMM | VEST3 score | CADD (phred) | SiPhy 29way (log Odds) |
| F2/P2            | GARS      | p.H216R              | D    | D         | D                               | D              | M                | T      | 0.908       | 22.4         | 10.631                 |
| F3/P4-5          | GARS      | p.K510Q              | T    | B         | D                               | D              | L                | D      | 0.507       | 18.38        | 13.659                 |
| F4/P8-P9         | SYT2      | p.P308L              | D    | D         | N                               | D              | H                | T      | 0.953       | 25.6         | 17.948                 |
| F5/P13,F6/P14-15 | BICD2     | p.S107L              | T    | D         | D                               | D              | M                | T      | 0.787       | 28.7         | 16.783                 |
| F9/P21-22        | IGHMBP2   | p.R605X              | T    | .         | D                               | D              | .                | .      | .           | 25           | 12.81                  |
| F10/P23          | TRPV4     | p.R269C              | T    | D         | D                               | D              | N                | D      | 0.957       | 13.58        | 12.232                 |
| F11/P24-25       | TRPV4     | p.D62N               | D    | D         | U                               | D              | L                | D      | 0.201       | 18.86        | 14.004                 |
| F16/P34-35-36    | DHTKD1    | p.A210S              | D    | B         | D                               | D              | N                | T      | 0.287       | 11.18        | 14.921                 |
| F24/ P47         | MORC2     | p.R190W              | D    | D         | D                               | D              | L                | T      | 0.936       | 19.12        | 14.304                 |
| F26/P50          | C12orf65  | p.L32fs              | .    | .         | .                               | .              | .                | .      | .           | .            | .                      |
| F27/P51          | FUS       | p.K511R              | D    | D         | D                               | D              | M                | D      | 0.844       | 15.36        | 10.436                 |
| F28/P52          | DCTN1     | p.R1275C             | D    | D         | D                               | D              | N                | T      | 0.654       | 31           | 18.468                 |
| F29/P53          | ATP7A     | p.Y760C              | D    | D         | D                               | D              | H                | D      | 0.97        | 21.4         | 14.894                 |
| F30/P54          | SACS      | p.L2261I             | D    | P         | D                               | D              | M                | D      | 0.688       | 18.64        | 19.949                 |
| F30/P54          | SACS      | p.S527X              | T    | .         | D                               | A              | .                | .      | .           | 40           | 20.024                 |
| F31/P55          | FIG4      | p.Q796X              | T    | .         | D                               | A              | .                | .      | .           | 40           | 18.787                 |
| F32/P56          | SLC52A3   | p.F457L              | D    | D         | D                               | D              | M                | T      | 0.978       | 17.17        | 10.944                 |
| F33/P57          | TBX5      | p.D111Y              | D    | D         | D                               | D              | M                | D      | 0.936       | 22.9         | 18.282                 |
| F34/P58-59       | STAT5B    | p.E315A              | T    | B         | D                               | D              | L                | T      | 0.354       | 13.9         | 9.432                  |
| F35/P60          | PTEN      | p.F90S               | .    | D         | D                               | D              | H                | D      | 0.968       | 23.8         | 14.841                 |
